# Supplementary material for: Robotic observations of high wintertime carbon export in California coastal waters
Source: Copernicus journal article supplement (doi:10.5194/bg-13-3109-2016), 2016-05-30
Supplement: Supplementary file 1 [file bg-13-3109-2016-supplement.zip]

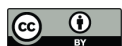

## *Supplement of*

# **Robotic observations of high wintertime carbon export in California coastal waters**

**James K. B. Bishop et al.**

*Correspondence to:* James K. B. Bishop (jkbishop@berkeley.edu)

- bg-13-3109-2016-supplement-title-page.pdf
- 20130120\_1049\_CFE001\_ATNc.bmp
- 20130120\_1111\_CFE001\_ATNr.bmp
- 20130120\_1130\_CFE001\_ATNr.bmp
- 20130120\_1155\_CFE001\_ATNr.bmp
- 20130120\_1217\_CFE001\_ATNr.bmp
- 20130120\_1239\_CFE001\_ATNr.bmp
- 20160502\_Summary\_CFE\_Fluxes\_BiogeosciencesSuppl.Excel.xlsx
- NH1204\_CFE001\_ATN\_160.mov
- NH1204\_CFE001\_DRK\_160.mov
- NH1204\_CFE001\_PL2\_60.mov
- NH1204\_CFE001\_TRA.mov
- NH1301SatImages.pptx
- NH1301\_BUOY84\_ATN\_160.mov
- NH1301\_BUOY84\_DRK\_160.mov
- NH1301\_BUOY84\_PL2\_60.mov
- NH1301\_BUOY84\_TRA.mov
- NH1301\_CFE001\_ATN\_160.mov
- NH1301\_CFE001\_DRK\_160.mov
- NH1301\_CFE001\_PL2\_60.mov

- NH1301\_CFE001\_TRA.mov
- NH1304\_CFE001\_ATN\_160.mov
- NH1304\_CFE001\_DRK\_160.mov
- NH1304\_CFE001\_PL2\_60.mov
- NH1304\_CFE001\_TRA.mov
- README.txt

The copyright of individual parts of the supplement might differ from the CC-BY 3.0 licence.
